# Supplementary material for: Barriers to Accessing Medicines among Syrian Asylum Seekers and Refugees in a German Federal State
Source: MDPI journal article supplement (doi:10.3390/ijerph18020519), 2021-01-10
Supplement: s1 [file s1]

**Table S1:** An overview of the questionnaire.

| Construct                                                            | Instrument                     | Questionnaire version                            | Modified or original | Type of modification                                                                                 | Existing or new Arabic translation |
|----------------------------------------------------------------------|--------------------------------|--------------------------------------------------|----------------------|------------------------------------------------------------------------------------------------------|------------------------------------|
| Use of medicine                                                      | DEGS<br>KIGGS                  | Adults (DEGS)<br>Children and adolescent (KiGGS) | Modified             | Removed a question (about contraceptive pill intake) *<br>Added specifications and changed the order | No                                 |
| Adherence to medication for chronic diseases                         | Brief Medication Questionnaire | Adults                                           | Original             | –                                                                                                    | No                                 |
| Barriers to accessing medicine (factors)                             | Self-constructed               | Adults and parents                               | Modified             | Added options<br>Simplification                                                                      | –                                  |
| Acceptance of taking medicine that contains alcohol or pork products | Self-Constructed               | Adults                                           | Modified             | Simplification                                                                                       | –                                  |
| Socioeconomic and sociodemographic factors                           | DEGS, KIGGS, REFMED            | Adults, children, and adolescents                | Modified             | Options for some questions added.<br>A question was removed.<br>Options reduced                      | Yes                                |

\* Participants suggested removing a question directed to female participants concerning whether they took contraceptive pills. This question could be viewed as inappropriate and can result in scepticism and an interruption of the survey process.

**Supplementary File 1:** Questions from the part of the questionnaire that focuses on barriers to accessing medicines among Syrian asylum seekers and refugees.

**Based on your experience, how much do these factors limit your access to medicine in Germany?**

[illegible]

**Before taking any medicine, do you check whether it contains any alcohol or pork products?**

[illegible]

**Would you take a medicine that contains any alcohol or pork products?**

[illegible]

**If the medicine I need would contain alcohol or pork products and there were no alternative to it, I will take this medicine:**

[illegible]
